# Supplementary material for: Back to the future? Conservative grassland management can preserve soil health in the changing landscapes of Uruguay
Source: Copernicus journal article supplement (doi:10.5194/soil-9-425-2023), 2023-07-24
Supplement: Supplementary file 1 [file soil-9-425-2023-supplement.pdf]

Supplement of SOIL, 9, 425–442, 2023  
<https://doi.org/10.5194/soil-9-425-2023-supplement>  
© Author(s) 2023. CC BY 4.0 License.

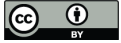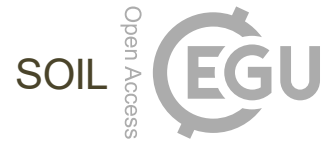

*Supplement of*

## **Back to the future? Conservative grassland management can preserve soil health in the changing landscapes of Uruguay**

**Ina Säumel et al.**

*Correspondence to:* Ina Säumel ([ina.saeumel@hu-berlin.de](mailto:ina.saeumel@hu-berlin.de))

The copyright of individual parts of the supplement might differ from the article licence.

# SUPPLEMENTARY

**Figure S1.** Variables examination: In addition to normality and homogeneity of variances tests, the 16 variables from topsoil samples were analyzed graphically by means of its distribution (mean depicted in dashed line) both overall and by main land use (AC, GL, NF, TP), and QQ-plot.

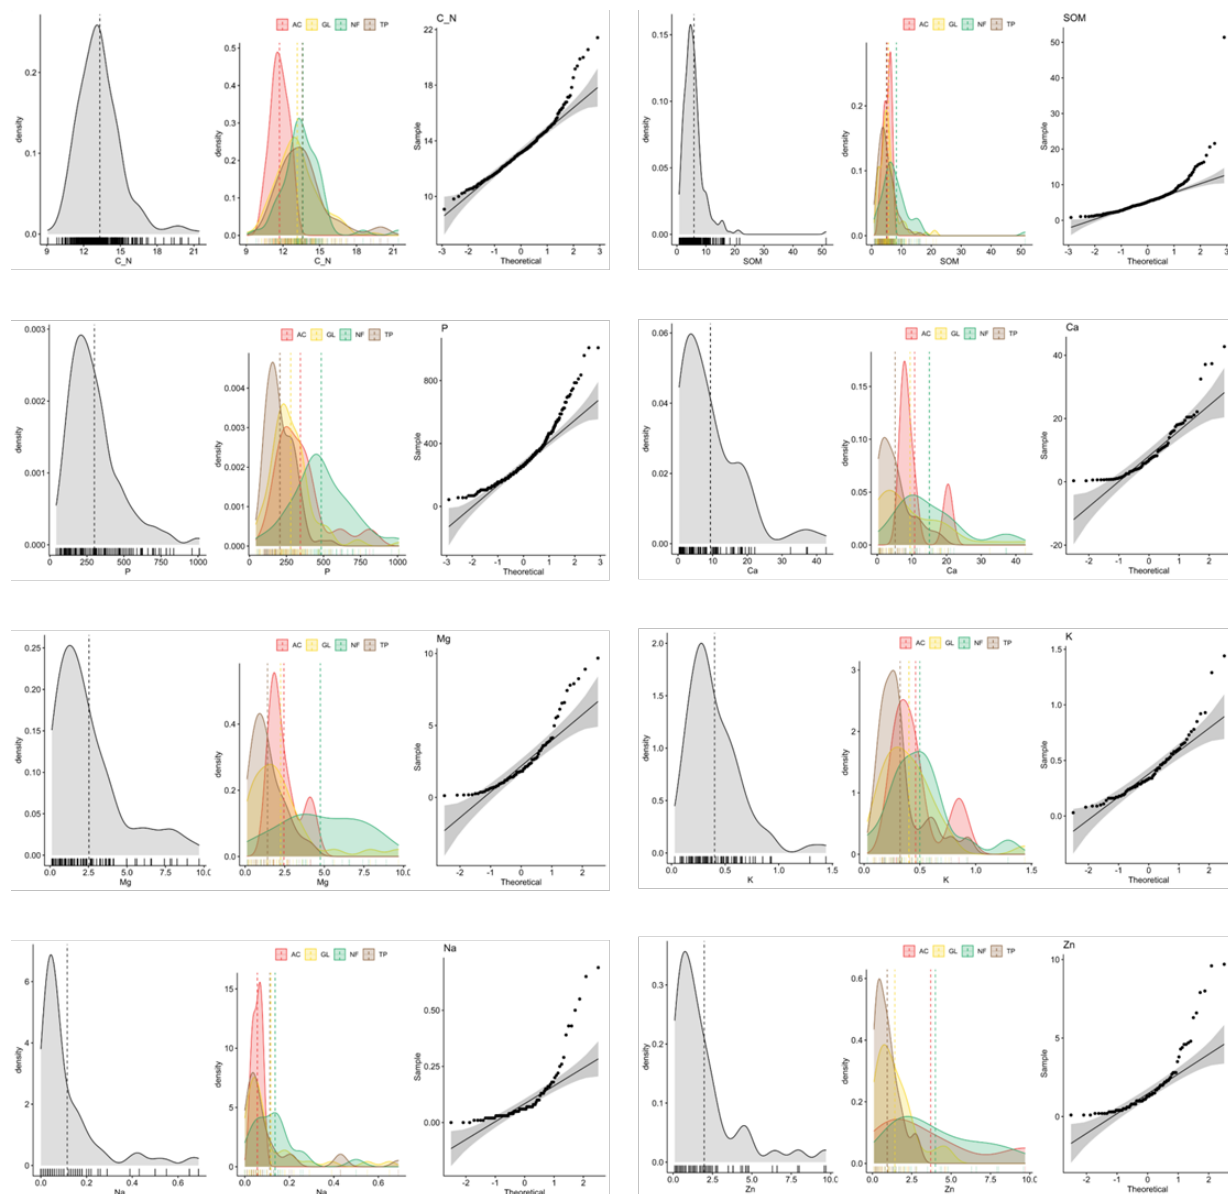

Figure S1. Continuation

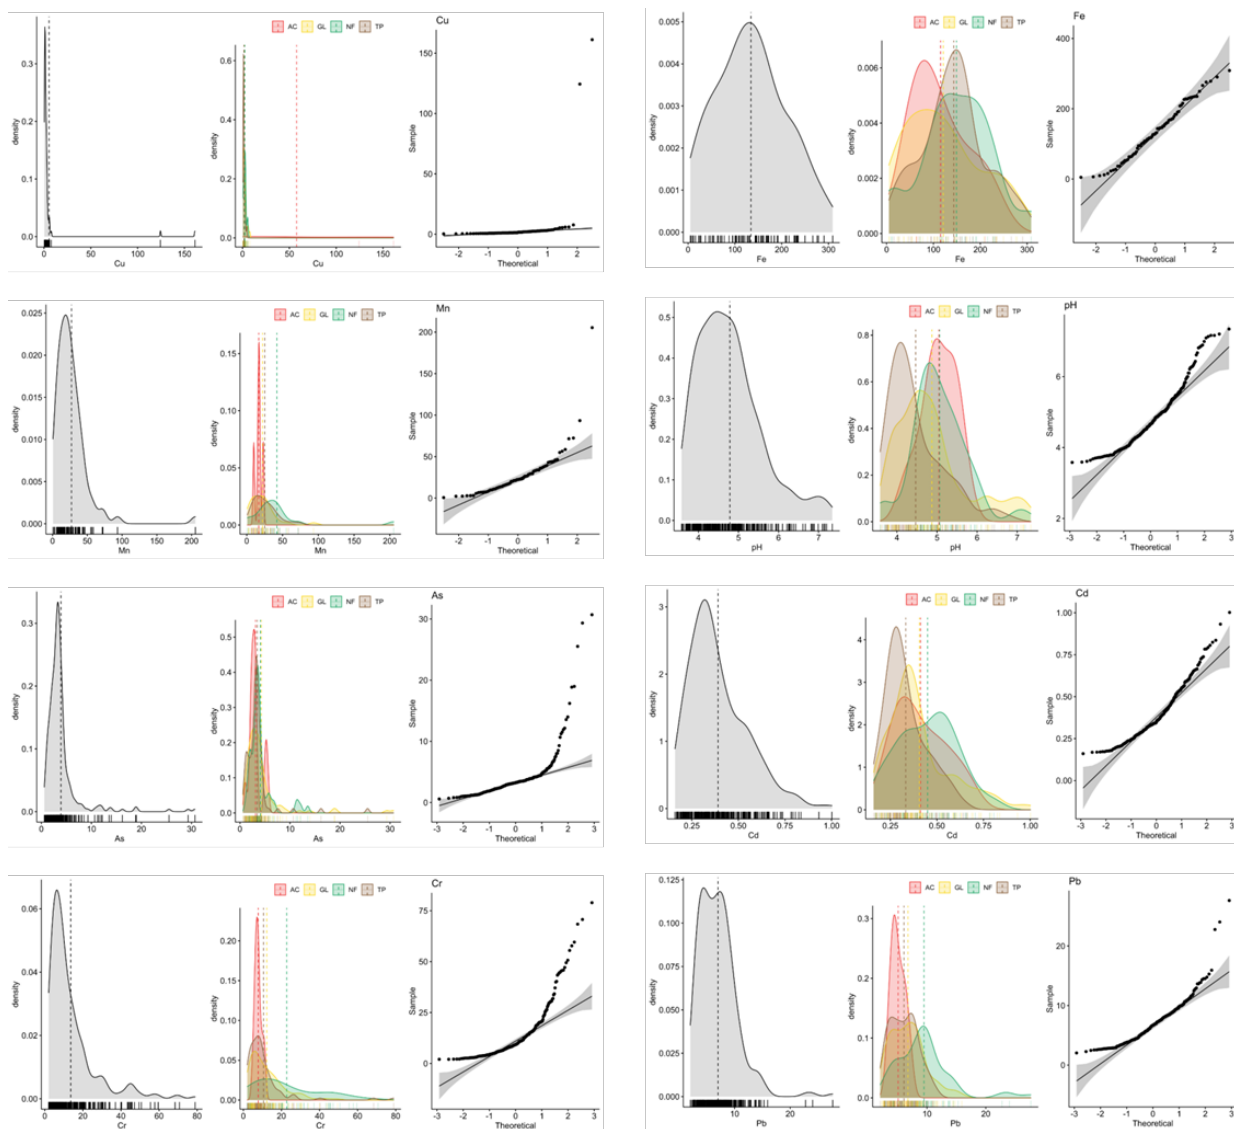

**Table S1.** Shapiro-Wilk normality test and Fligner-Killeen test of homogeneity of variances by land use

| Variable  | Shapiro-Wilk normality test |           | Fligner-Killeen test of homogeneity of variances by land use |    |           |
|-----------|-----------------------------|-----------|--------------------------------------------------------------|----|-----------|
|           | W                           | p-value   | med chi-squared                                              | df | p-value   |
| C/N ratio | 0.93349                     | 6.831e-10 | 9.2971                                                       | 3  | 0.02559   |
| SOC       | 0.67602                     | < 2.2e-16 | 13.82                                                        | 3  | 0.003161  |
| Ca        | 0.83698                     | 4.563e-08 | 7.5164                                                       | 3  | 0.05714   |
| Mg        | 0.84532                     | 8.56e-08  | 15.602                                                       | 3  | 0.001368  |
| K         | 0.88327                     | 2.01e-06  | 2.5556                                                       | 3  | 0.4653    |
| Na        | 0.68901                     | 6.875e-12 | 3.3219                                                       | 3  | 0.3446    |
| Zn        | 0.75882                     | 2.775e-10 | 22.615                                                       | 3  | 4.858e-05 |
| Cu        | 0.18589                     | < 2.2e-16 | 9.0525                                                       | 3  | 0.0286    |
| Fe        | 0.97861                     | 0.1876    | 1.7833                                                       | 3  | 0.6186    |
| Mn        | 0.65658                     | 1.496e-12 | 5.9795                                                       | 3  | 0.1126    |
| pH        | 0.93056                     | 3.828e-10 | 7.6001                                                       | 3  | 0.05504   |
| As        | 0.54474                     | < 2.2e-16 | 10.733                                                       | 3  | 0.01326   |
| Cd        | 0.93222                     | 7.127e-10 | 9.4819                                                       | 3  | 0.02352   |
| Cr        | 0.74825                     | < 2.2e-16 | 49.433                                                       | 3  | 1.055e-10 |
| Pb        | 0.87683                     | 3.161e-14 | 16.773                                                       | 3  | 0.0007868 |

**Table S2.** Spatial autocorrelation of soil samples. P-values > 0.05 indicate the pattern does not appear to be significantly different than random. Moran's Index was calculated using ArcGIS 10.3 (ESRI, 2018).

| Variable                                                               | Moran's Index | z-score | p-value |
|------------------------------------------------------------------------|---------------|---------|---------|
| Humidity (%)                                                           | 0.565         | 3.693   | 0.0002  |
| N_total (%)                                                            | 0.209         | 1.407   | 0.1593  |
| C_total (%)                                                            | 0.147         | 1.050   | 0.2935  |
| C/N ratio                                                              | 0.004         | 0.049   | 0.9609  |
| SOC (%)                                                                | 0.232         | 1.407   | 0.1594  |
| P (mg kg <sup>-1</sup> )                                               | 0.470         | 3.071   | 0.0021  |
| Ca (cmol kg <sup>-1</sup> )                                            | -0.002        | 0.012   | 0.9904  |
| Mg (cmol kg <sup>-1</sup> )                                            | 0.037         | 0.060   | 0.9520  |
| K (cmol kg <sup>-1</sup> )                                             | -0.114        | -0.125  | 0.9003  |
| Na (cmol kg <sup>-1</sup> )                                            | 0.043         | 0.069   | 0.9448  |
| Zn (mg kg <sup>-1</sup> )                                              | 0.172         | 0.228   | 0.8193  |
| Cu (mg kg <sup>-1</sup> )                                              | 0.046         | 0.099   | 0.9212  |
| Fe (mg kg <sup>-1</sup> )                                              | -1.288        | -1.533  | 0.1253  |
| Mn (mg kg <sup>-1</sup> )                                              | -0.067        | -0.066  | 0.9474  |
| ph (all soil types)                                                    | 0.479         | 3.127   | 0.0018  |
| pH - Argiudolls                                                        | -0.184        | -0.486  | 0.6271  |
| pH - Argiudolls_Hapluderts                                             | 0.144         | 1.373   | 0.1699  |
| pH - Hapludalfts_Hapludults                                            | 0.674         | 5.873   | 0.0000  |
| As (mg kg <sup>-1</sup> )                                              | 0.686         | 4.694   | 0.0000  |
| Cd (mg kg <sup>-1</sup> )                                              | 0.464         | 3.229   | 0.0012  |
| Cr (mg kg <sup>-1</sup> )                                              | 0.557         | 3.680   | 0.0002  |
| Pb (mg kg <sup>-1</sup> )                                              | 0.832         | 5.495   | 0.0000  |
| CEC (cmol kg <sup>-1</sup> )                                           | 0.013         | 0.031   | 0.9750  |
| K <sup>+</sup> /(Ca <sup>2+</sup> +Mg <sup>2+</sup> )                  | 0.048         | 0.077   | 0.9388  |
| K <sup>+</sup> /(Ca <sup>2+</sup> +Mg <sup>2+</sup> +Na <sup>+</sup> ) | 0.051         | 0.080   | 0.9360  |

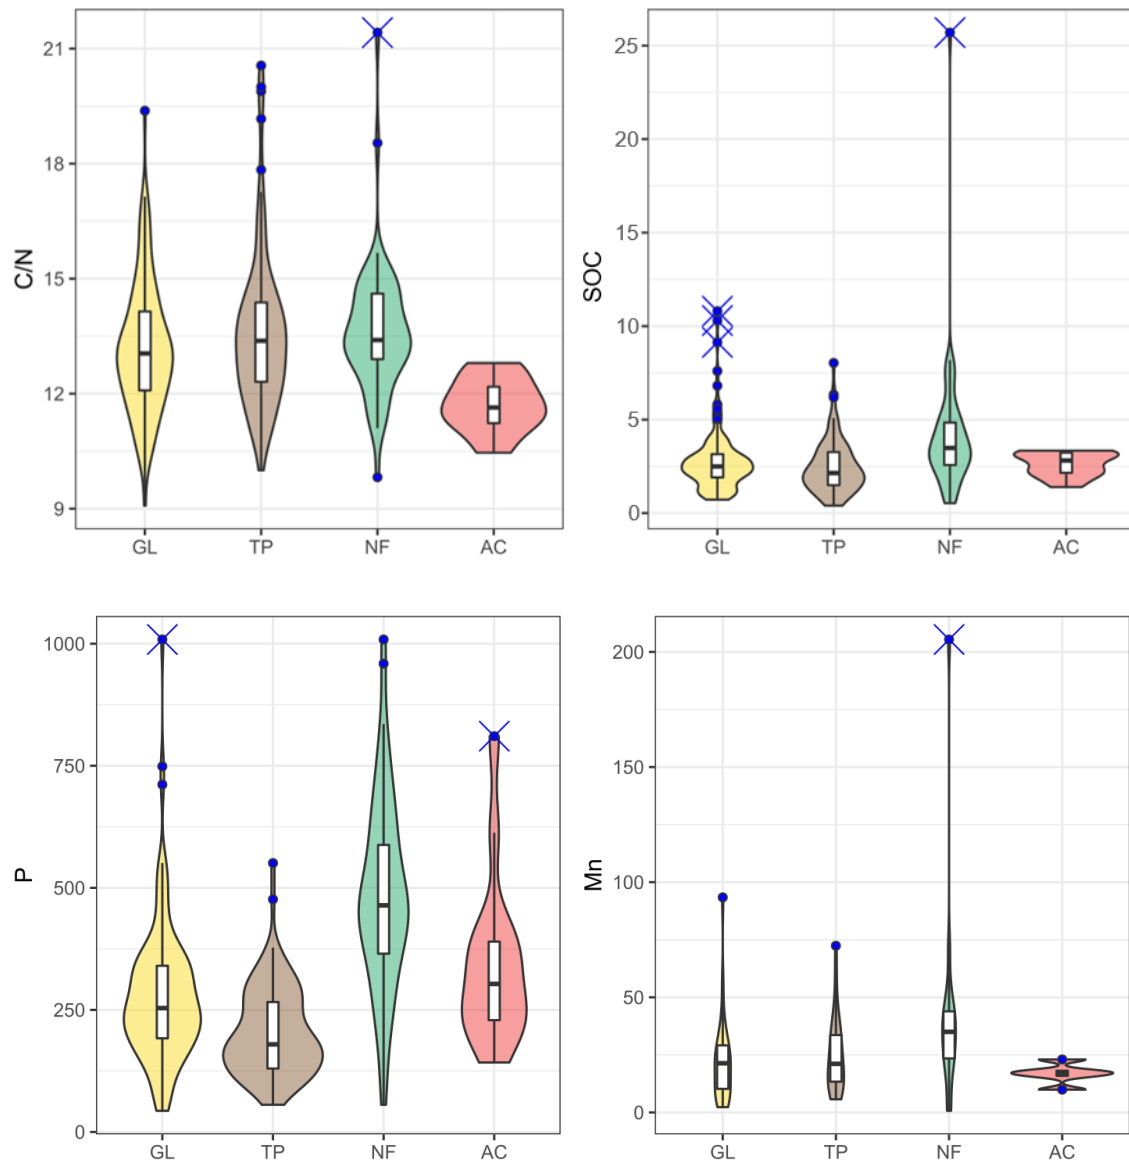

**Figure S2.** Outliers detection: Variables were analyzed in the context of the sites, replicates and land use and soils classifications with violin/box plots, with emphasis on the identification (depicted as blue points) and extraction (marked as blue X) of outliers ( $> 1.5$  IQR, extreme outliers  $> 3$  IQR), as shown below for cases with an outlier removal.

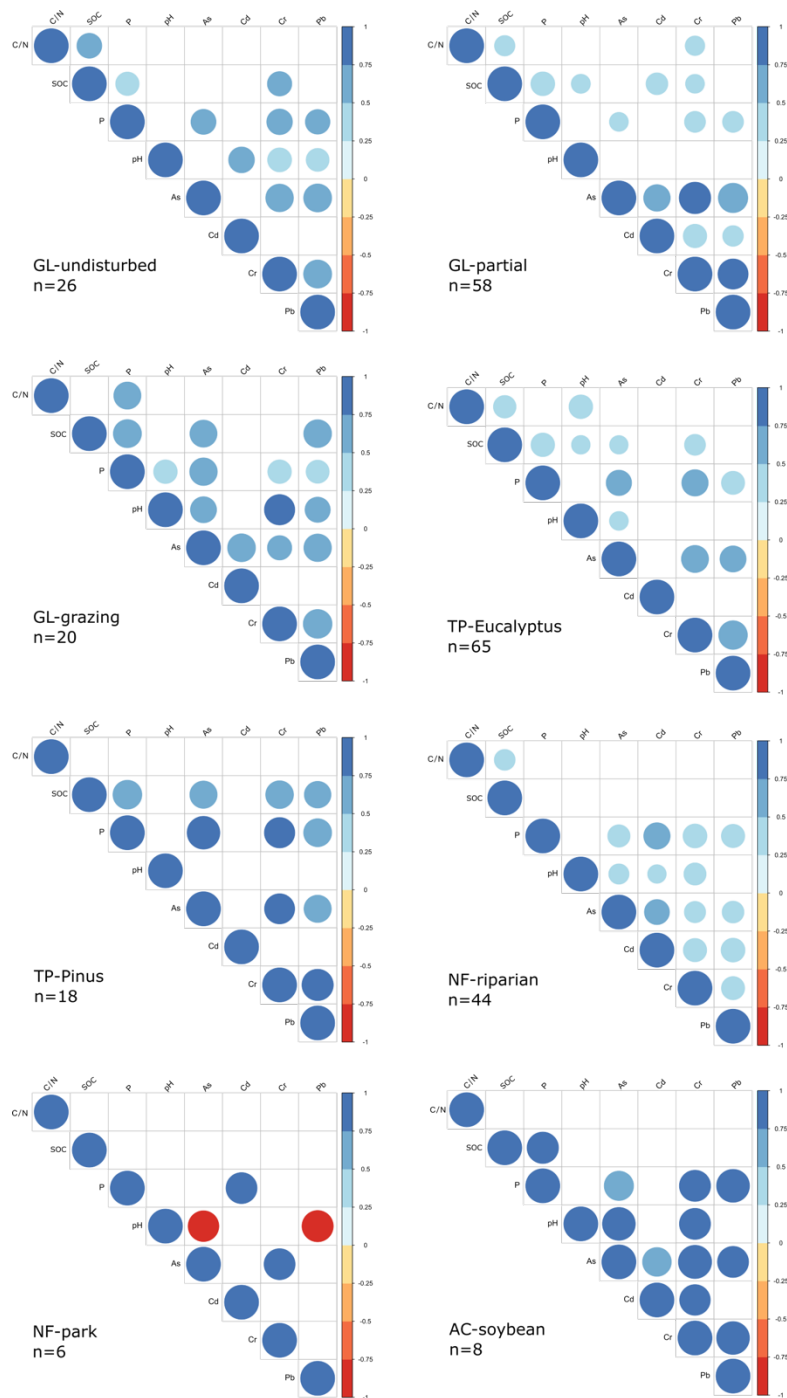

**Figure S3.** Spearman's rank correlations for variables related to the quality of topsoils in country-wide samples according to its main land use sub-classification (GL: grassland; TP: timber plantation; NF: natural forest, AC: agriculture). Samples from timber plantation land use types of *Salix* and *Populus* species, as well as hill natural forest, and citrus agriculture plantations were too few for the analysis. Colour intensity and the size of the circle are proportional to the correlation coefficients ( $\rho$ ). Slots are shown empty for correlations with  $p > 0.05$ ;  $n$  is the number of observations used in the analysis.

**Table S3.** Permutational multivariate analysis of variance (PERMANOVA) of across and between grasslands (GL), timber plantation (TP) and native forest (NF) land uses (9999 permutations), using all the variables. df = degrees of freedom, SS = sum of squares, MS = mean square, P-adj = adjusted P with Benjamini & Hochberg correction. See NDMS in Fig. 3a.

|                     | df | SS     | MS     | <i>F</i> | R <sup>2</sup> | P        | P-adj    |
|---------------------|----|--------|--------|----------|----------------|----------|----------|
| <i>Country-wide</i> |    |        |        |          |                |          |          |
| Land use (GLxTPxNF) | 2  | 156.22 | 78.111 | 5.5442   | 0.14573        | 1.00E-04 |          |
| Residuals           | 65 | 915.78 | 14.089 |          | 0.85427        |          |          |
| Total               | 67 | 1072   |        |          | 1.00000        |          |          |
| <i>Pairwise</i>     |    |        |        |          |                |          |          |
| Land use (GLxTP)    | 1  | 48.01  | 48.015 | 3.1187   | 0.05557        | 9.30E-03 | 9.30E-03 |
| Residuals           | 53 | 815.99 | 15.396 |          | 0.94443        |          |          |
| Total               | 54 | 864    |        |          | 1.00000        |          |          |
| Land use (GLxNF)    | 1  | 63.3   | 63.296 | 4.2633   | 0.09419        | 2.10E-03 | 3.15E-03 |
| Residuals           | 41 | 608.7  | 14.846 |          | 0.90581        |          |          |
| Total               | 42 | 672.00 |        |          | 1.00000        |          |          |
| Land use (TPxNF)    | 1  | 133.01 | 133.01 | 10.432   | 0.22467        | 1.00E-04 | 3.00E-04 |
| Residuals           | 36 | 458.99 | 12.75  |          | 0.77533        |          |          |
| Total               | 37 | 592.00 |        |          | 1.00000        |          |          |

**Table S4.** Permutational multivariate analysis of variance (PERMANOVA) between *Eucalyptus* and *Pinus* (9999 permutations), using C/N ratio, SOM, P, pH, As, Cd, Cr and Pb. df = degrees of freedom, SS = sum of squares, MS = mean square. See NDMS in Fig. 3b.

|                                               | df | SS     | MS     | <i>F</i> | R <sup>2</sup> | P      |
|-----------------------------------------------|----|--------|--------|----------|----------------|--------|
| <i>Country-wide</i>                           |    |        |        |          |                |        |
| Land use ( <i>Eucalyptus</i> , <i>Pinus</i> ) | 1  | 37.18  | 37.176 | 4.8661   | 0.05667        | 0,0007 |
| Residuals                                     | 81 | 618.82 | 7.640  |          | 0.94333        |        |
| Total                                         | 82 | 656.00 |        |          | 1              |        |



**Table S5.** Permutational multivariate analysis of variance (PERMANOVA) across Argiudolls and between grasslands (GL), timber plantation (TP), native forest (NF) and Agriculture (AC) land uses (9999 permutations), using all variables. df = degrees of freedom, SS = sum of squares, MS = mean square, P-adj = adjusted P with Benjamini & Hochberg correction. See NDMS in Fig. 3c.

|                           | df | SS      | MS      | <i>F</i> | R <sup>2</sup> | P      | P-Adj   |
|---------------------------|----|---------|---------|----------|----------------|--------|---------|
| <i>Country-wide</i>       |    |         |         |          |                |        |         |
| Land use (AC, GL, NF, TP) | 3  | 79.87   | 26.6225 | 3.7087   | 0.14061        | 0.0004 |         |
| Residuals                 | 68 | 488.13  | 7.1784  |          | 0.85939        |        |         |
| Total                     | 71 | 568.0   |         |          | 1              |        |         |
| <i>Pairwise</i>           |    |         |         |          |                |        |         |
| Land use (GL, TP)         | 1  | 5.2     | 5.2020  | 0.64565  | 0.01301        | 0.6798 | 0.68910 |
| Residuals                 | 49 | 394.8   | 8.0571  |          | 0.98699        |        |         |
| Total                     | 50 | 400     |         |          | 1              |        |         |
| Land use (GL, NF)         | 1  | 51.582  | 51.582  | 7.5975   | 0.17426        | 0.0002 | 0.00060 |
| Residuals                 | 36 | 244.418 | 6.789   |          | 0.82574        |        |         |
| Total                     | 37 | 296     |         |          | 1              |        |         |
| Land use (GL, AC)         | 1  | 17.93   | 17.9324 | 2.3152   | 0.05604        | 0.0407 | 0.05556 |
| Residuals                 | 39 | 302.07  | 7.7453  |          | 0.94369        |        |         |
| Total                     | 40 | 320.00  |         |          | 1              |        |         |
| Land use (TP, NF)         | 1  | 29.765  | 29.7562 | 4.1044   | 0.12398        | 0.003  | 0.00780 |
| Residuals                 | 29 | 210.244 | 7.2498  |          | 0.87602        |        |         |
| Total                     | 30 | 240.000 |         |          | 1              |        |         |
| Land use (TP, AC)         | 1  | 19.876  | 19.8764 | 2.6054   | 0.07529        | 0.0236 | 0.03360 |
| Residuals                 | 32 | 244.124 | 7.6289  |          | 0.92471        |        |         |
| Total                     | 33 | 264.000 |         |          | 1              |        |         |
| Land use (NF, AC)         | 1  | 33.412  | 33.412  | 5.015    | 0.20883        | 0.0028 | 0.00660 |
| Residuals                 | 19 | 126.588 | 6.663   |          | 0.79117        |        |         |
| Total                     | 20 | 160.00  |         |          | 1              |        |         |

**Table S6.** Permutational multivariate analysis of variance (PERMANOVA) across Argiudolls & Hapluderts and between grasslands (GL), timber plantation (TP) and native forest (NF) land uses (9999 permutations). df = degrees of freedom, SS = sum of squares, MS = mean square, P-adj = adjusted P with Benjamini & Hochberg correction. See NDMS in Fig. 3d.

|                       | df | SS      | MS      | F      | R <sup>2</sup> | P      | P-Adj   |
|-----------------------|----|---------|---------|--------|----------------|--------|---------|
| <i>Country-wide</i>   |    |         |         |        |                |        |         |
| Land use (GL, TP, NF) | 2  | 53.71   | 26.85   | 3.80   | 0.15986        | 0.0009 |         |
| Residuals             | 40 | 282.29  | 7.0572  |        | 0.84014        |        |         |
| Total                 | 42 | 336.00  |         |        | 1              |        |         |
| <i>Pairwise</i>       |    |         |         |        |                |        |         |
| Land use (GL, TP)     | 1  | 34.006  | 34.006  | 4.6727 | 0.11489        | 0.0015 | 0.00345 |
| Residuals             | 36 | 261.994 | 7.278   |        | 0.88511        |        |         |
| Total                 | 37 | 296.000 |         |        | 1              |        |         |
| Land use (GL, NF)     | 1  | 10.931  | 10.9307 | 1.3867 | 0.05255        | 0.2181 | 0.21290 |
| Residuals             | 25 | 197     | 7.8828  |        | 0.94745        |        |         |
| Total                 | 26 | 208.000 |         |        | 1              |        |         |
| Land use (TP, NF)     | 1  | 41.557  | 41,557  | 6,6663 | 0,25973        | 0,0008 | 0.00090 |
| Residuals             | 19 | 118,443 | 6,234   |        | 0,74027        |        |         |
| Total                 | 20 | 160,000 |         |        | 1              |        |         |

**Table S7.** Permutational multivariate analysis of variance (PERMANOVA) across Argiudolls, Hapudolls & Hapludalf and between grasslands (GL), timber plantation (TP) and native forest (NF) land uses (9999 permutations). df = degrees of freedom, SS = sum of squares, MS = mean square, P-adj = adjusted P with Benjamini & Hochberg correction. See NDMS in Fig. 3e.

|                       | df | SS      | MS      | F      | R <sup>2</sup> | P      | P-Adj  |
|-----------------------|----|---------|---------|--------|----------------|--------|--------|
| <i>Country-wide</i>   |    |         |         |        |                |        |        |
| Land use (GL, TP, NF) | 2  | 32,874  | 16,4369 | 2,21   | 0,12841        | 0,0284 |        |
| Residuals             | 30 | 223,126 | 7,4375  |        | 0,87159        |        |        |
| Total                 | 32 | 526,000 |         |        | 1              |        |        |
| <i>Pairwise</i>       |    |         |         |        |                |        |        |
| Land use (GL, TP)     | 1  | 21,044  | 21,0439 | 2,8774 | 0,13152        | 0,0285 | 0.0438 |
| Residuals             | 19 | 138,956 | 7,3135  |        | 0,86848        |        |        |
| Total                 | 20 | 160,000 |         |        | 1              |        |        |
| Land use (GL, NF)     | 1  | 08,259  | 10,2588 | 1,2998 | 0,05829        | 0,246  | 0.2537 |
| Residuals             | 21 | 165,741 | 7,8924  |        | 0,94171        |        |        |
| Total                 | 22 | 176,000 |         |        | 1              |        |        |
| Land use (TP, NF)     | 1  | 21,218  | 21,2184 | 2,8912 | 0,1263         | 0,0162 | 0.0438 |
| Residuals             | 20 | 146,782 | 7,3391  |        | 0,8737         |        |        |
| Total                 | 21 | 168,000 |         |        | 1              |        |        |

**Table S8.** Permutational multivariate analysis of variance (PERMANOVA) across Hapludalfs & Hapludults and between grasslands (GL), timber plantation (TP) and native forest (NF) land uses (9999 permutations). df = degrees of freedom, SS = sum of squares, MS = mean square, P-adj = adjusted P with Benjamini & Hochberg correction. See NDMS in Fig. 3f.

|                       | df | SS      | MS      | <i>F</i> | R <sup>2</sup> | P      | P-Adj  |
|-----------------------|----|---------|---------|----------|----------------|--------|--------|
| <i>Country-wide</i>   |    |         |         |          |                |        |        |
| Land use (GL, TP, NF) | 2  | 132,25  | 66,123  | 12,341   | 0,35936        | 0,0001 |        |
| Residuals             | 44 | 235,75  | 5,358   |          | 0,64064        |        |        |
| Total                 | 46 | 368,00  |         |          | 1              |        |        |
| <i>Pairwise</i>       |    |         |         |          |                |        |        |
| Land use (GL, TP)     | 1  | 21,251  | 21,2510 | 2,7845   | 0,07179        | 0,0325 | 0.0342 |
| Residuals             | 36 | 274,749 | 7,6319  |          | 0,92821        |        |        |
| Total                 | 37 | 296,000 |         |          | 1              |        |        |
| Land use (GL, NF)     | 1  | 65,392  | 65,392  | 11,464   | 0,31439        | 0,0001 | 0.0006 |
| Residuals             | 25 | 142,608 | 5,704   |          | 0,68561        |        |        |
| Total                 | 26 | 208,000 |         |          | 1              |        |        |
| Land use (TP, NF)     | 1  | 98,911  | 98,911  | 21,349   | 0,4157         | 0,0001 | 0.0003 |
| Residuals             | 27 | 125,089 | 4,633   |          | 0,55843        |        |        |
| Total                 | 28 | 224,000 |         |          | 1              |        |        |

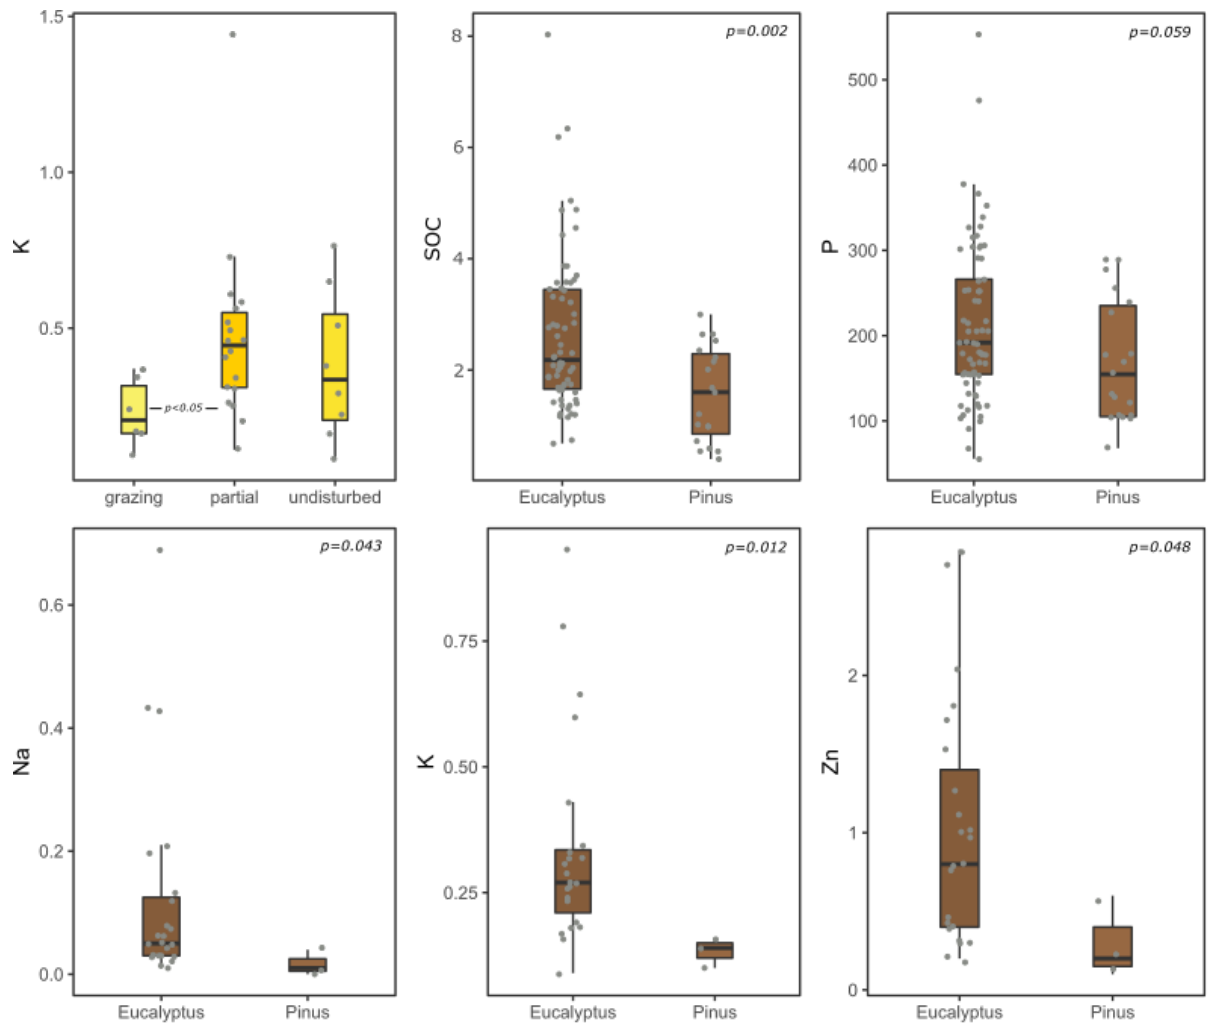

**Figure S4.** Box Plots for significant Kruskal-Wallis Tests across soil categories of GL and TP land uses for fertility variables. Plots were classified in more specific subcategories: GL in ‘undisturbed’, ‘partially grazed’ and ‘highly grazed’ plots; TP in ‘*Eucalyptus*’ or ‘*Pinus*’ plots; NF in ‘park’ or ‘riparian’ plots; and AC plots in ‘orchards’ or ‘crops’.

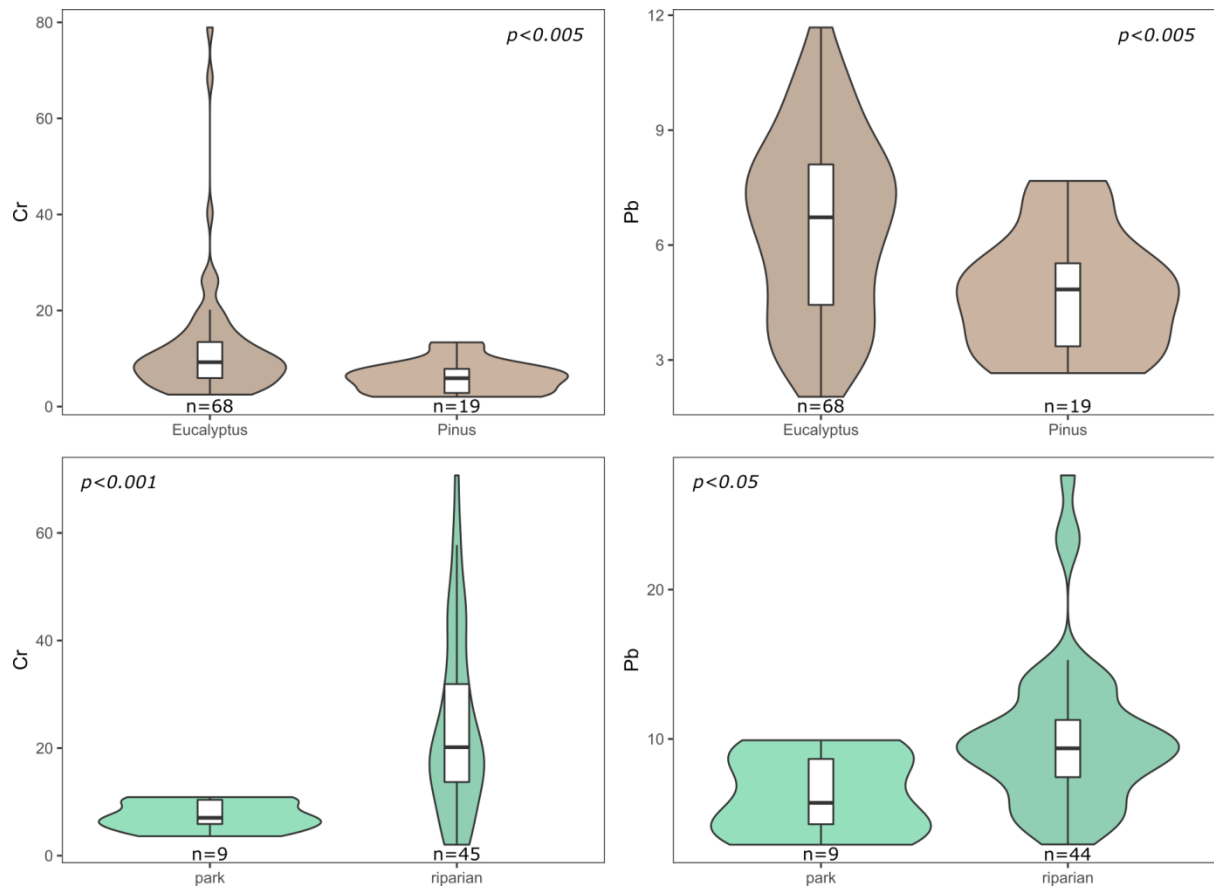

**Figure S5.** Violin/Box Plots for significant Kruskal-Wallis Tests across evaluated country-wide land uses sub-classifications for trace metals variables. Sample number is depicted in each case.
